# Supplementary material
Source: Springer Nature journal article supplement (https://www.springermedizin.de/resource/supplementary/12885_2011_2827_MOESM4_ESM.pdf/9462092)

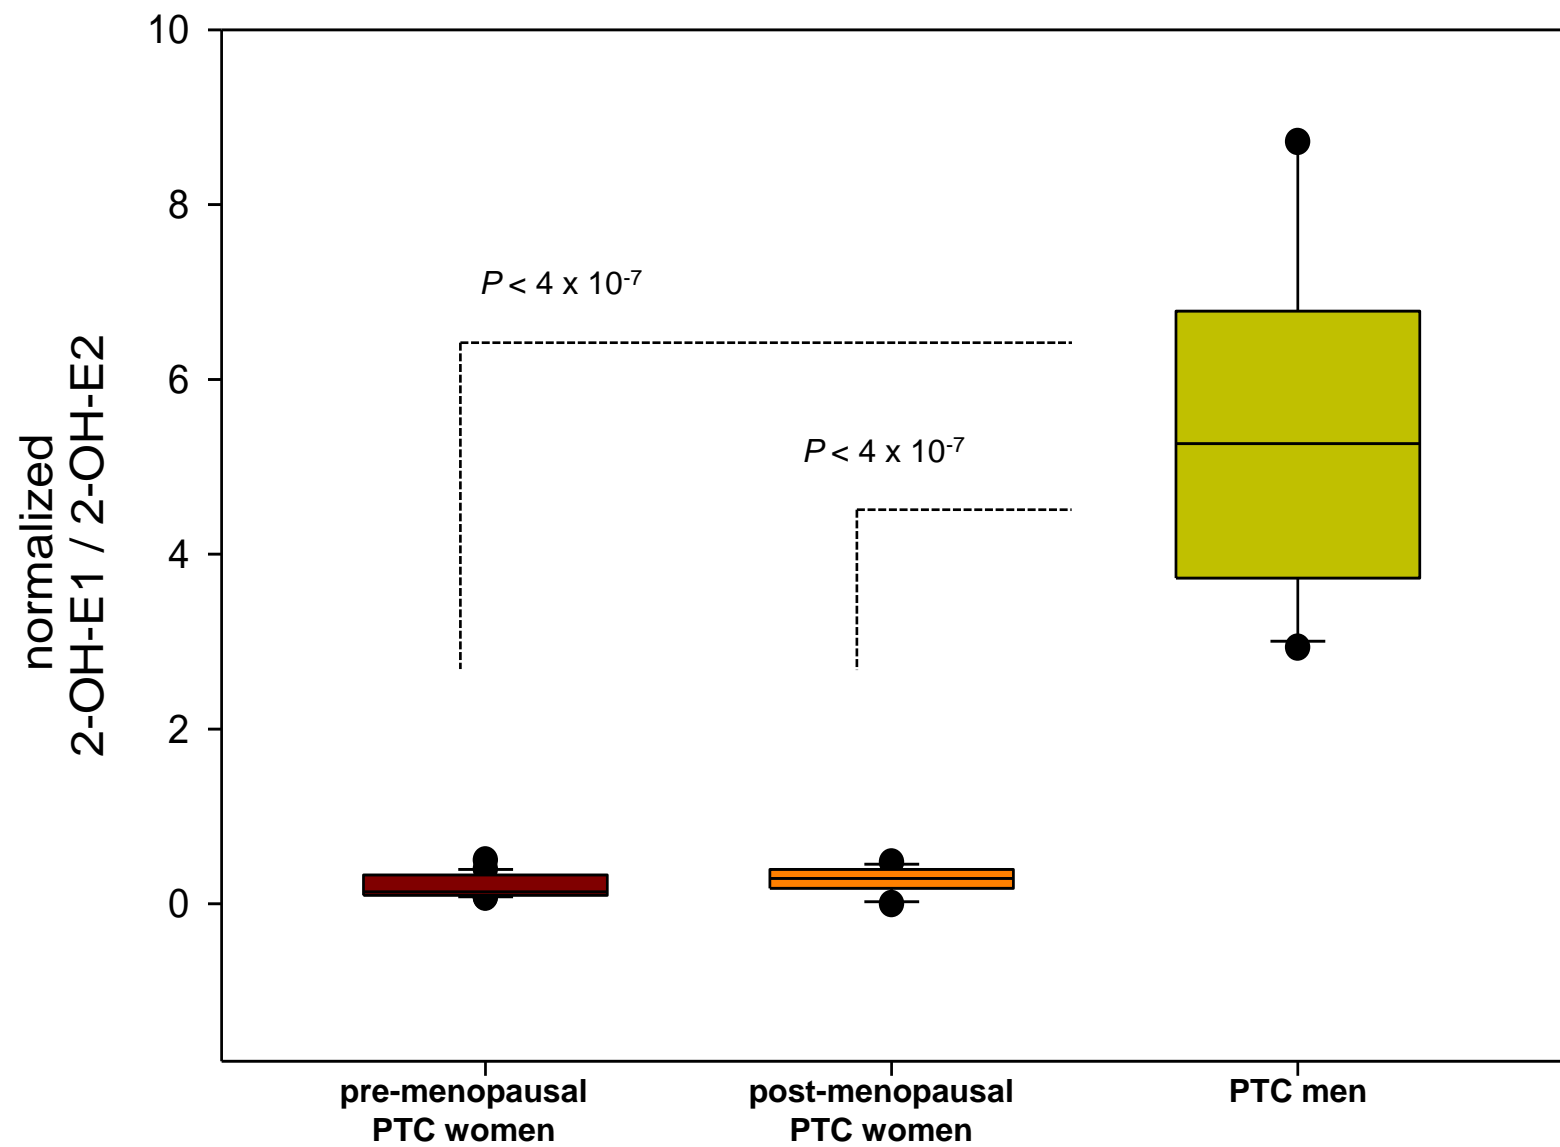

Supplement: MOESM4 [file 9462092]
